# Supplementary material
Source: MDPI journal article supplement (https://www.mdpi.com/2073-4344/13/9/1295)
Supplement: s1 [file s1]

## Supporting Information

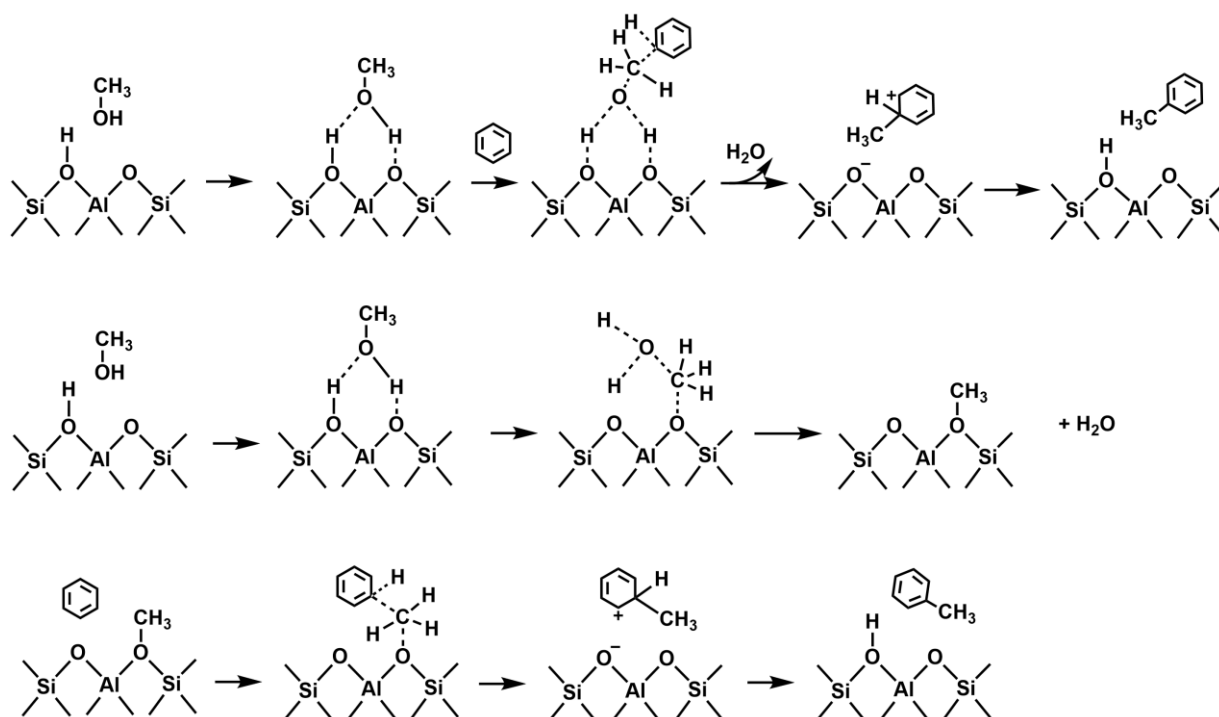

**Figure S1.** Schematic representation of the stepwise (middle and bottom row) and concerted mechanism (top row) for benzene alkylation with methanol on H-ZSM-5 zeolite.
